# Supplementary material for: A Chemometry of Aldrovanda vesiculosa L. (Waterwheel, Droseraceae) Populations
Source: PubMed Central journal article supplement (PMC7795913; doi:10.3390/molecules26010072), 2020-12-25
Supplement: molecules-26-00072-s001.pdf [file molecules-26-00072-s001.pdf]

SUPPLEMENTARY MATERIALS

## A Chemometry of *Aldrovanda Vesiculosa* L. (Waterwheel, Droseraceae) Populations

Bartosz J. Płachno <sup>1,\*</sup>, Maciej Strzemiński <sup>2,\*</sup>, Sławomir Dresler <sup>3\*</sup>, Lubomír Adamec <sup>4</sup>, Kamila Wojas-Krawczyk <sup>5</sup>, Ireneusz Sowa <sup>2</sup>, Anna Danielewicz <sup>6</sup> and Vitor F. O. Miranda <sup>7</sup>

<sup>1</sup> Department of Plant Cytology and Embryology, Institute of Botany, Faculty of Biology, Jagiellonian University in Kraków, Gronostajowa 9 St. 30-387 Cracow, Poland; bartosz.plachno@uj.edu.pl (B.J.P.); <https://orcid.org/0000-0001-5579-5101>

<sup>2</sup> Department of Analytical Chemistry, Medical University of Lublin, Chodźki 4a, 20-093 Lublin, Poland; maciej.strzemiński@poczta.onet.pl (M.S.), i.sowa@umlub.pl (I.S.)

<sup>3</sup> Department of Plant Physiology and Biophysics, Institute of Biological Science, Maria Curie-Skłodowska University, Akademicka 19, 20-033 Lublin, Poland; slawomir.dresler@poczta.umcs.lublin.pl (S.D.);

<sup>4</sup> Department of Experimental and Functional Morphology, Institute of Botany CAS, Dukelská 135, CZ-379 01 Třeboň, Czech Republic; lubomir.adamec@ibot.cas.cz (L.A.);

<sup>5</sup> Department of Pneumology, Oncology and Allergology, Medical University of Lublin, 20-090 Lublin, Poland; kamilawojas@wp.pl (K.W-K.);

<sup>6</sup> Department of Paediatric Orthopaedics, Medical University of Lublin, 20-093 Lublin, Poland (A.D.); anna.danielewicz@umlub.pl;

<sup>7</sup> UNESP - São Paulo State University, School of Agricultural and Veterinarian Sciences, Department of Applied Biology, Laboratory of Plant Systematics, Campus Jaboticabal, CEP 14884-900, SP, Brazil; vitor.miranda@unesp.br (V.M.);

\* Correspondence: maciej.strzemiński@poczta.onet.pl; bartosz.plachno@uj.edu.pl; slawomir.dresler@poczta.umcs.lublin.pl.

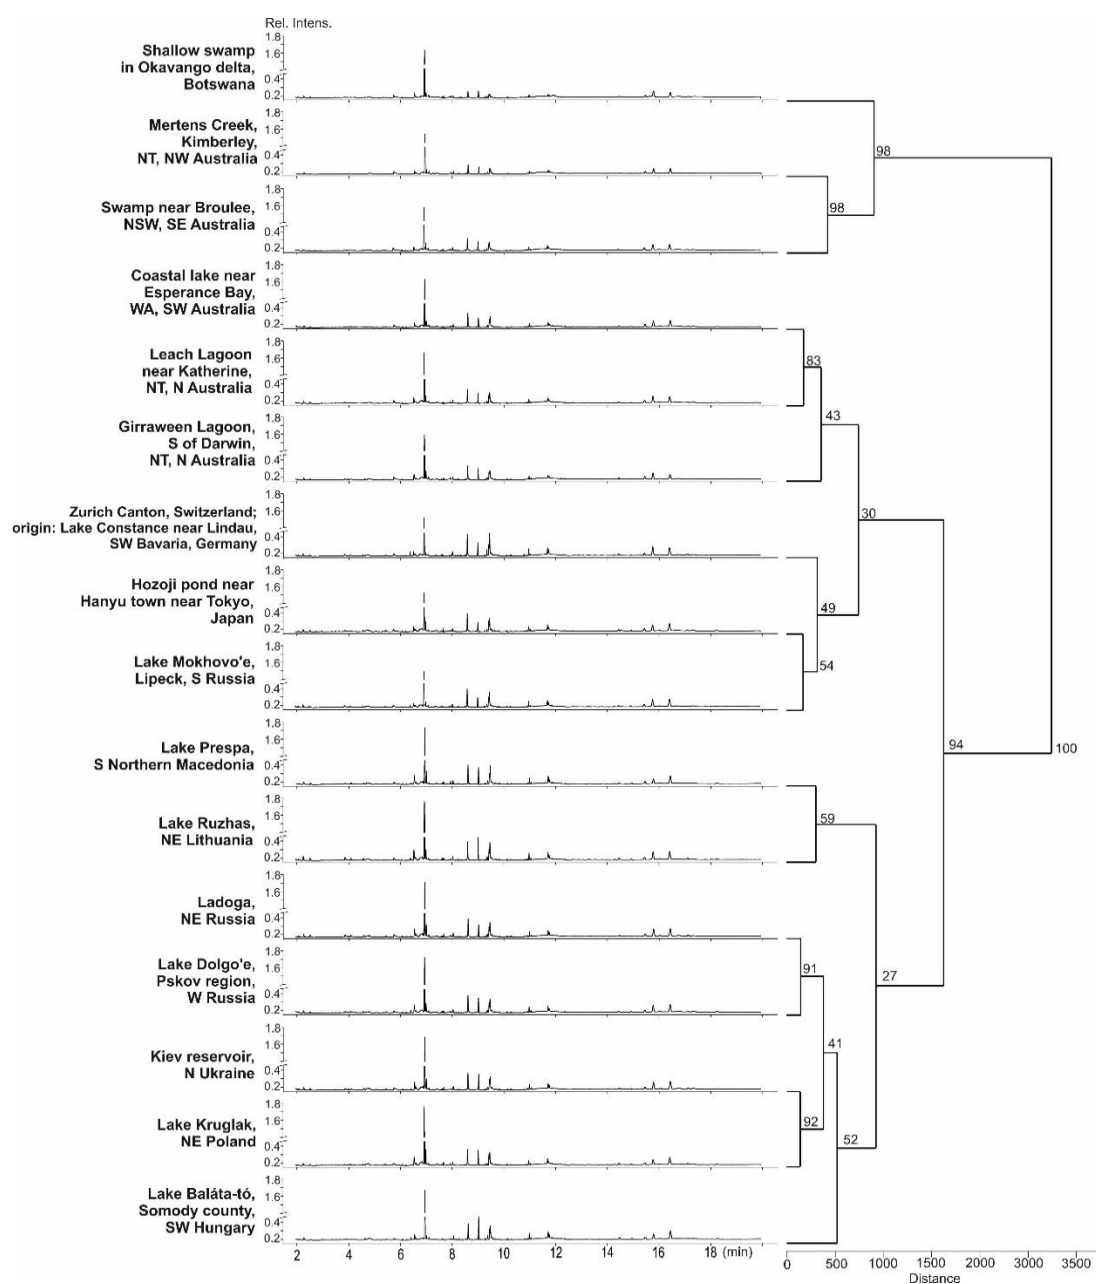

**Figure S1.** GC-FID chromatographic profiles of *Aldrovanda vesiculosa* populations. On the right, hierarchical clustering dendrograms with bootstrap values based on the Euclidean distances with the Ward's method are shown.
